# Supplementary material for: Role of microRNAs and their downstream target transcription factors in zebrafish thrombopoiesis
Source: Sci Rep. 2023 Sep 26;13:16066. doi: 10.1038/s41598-023-42868-7 (PMC10522587; doi:10.1038/s41598-023-42868-7)
Supplement: Supplementary file 2 — Supplementary Information 2. [file 41598_2023_42868_MOESM2_ESM.xlsx]

## Sheet: Common let-7b and RNA-Seq targe
	1821 genes are in common between let-7b miRWalk targets and thrombocyte RNAseq data. The genes highlighted are the ones used in the study.
	a2ml
	aanat2
	aass
	abcb9
	abcd1
	abcg2a
	abcg2c
	abhd12
	abi2b
	acap2
	acap3b
	acat2
	acbd7
	acer3
	acot11a
	acot8
	acp5a
	acsl1a
	acsl4b
	acsm3
	acss1
	acta1a
	actn2b
	actn3a
	actn3b
	acvr1ba
	acvrl1
	acy3.1
	adad1
	adam28
	adam9
	adat1
	adat2
	adck5
	adcy2b
	adgrl4
	adh8a
	adh8b
	adhfe1
	adm2a
	adprhl1
	adprm
	adra2a
	aebp2
	aftpha
	agbl5
	agk
	agmo
	ago3b
	agpat9l
	agps
	ahr1b
	aifm3
	ak7a
	akap12b
	alcama
	aldh5a1
	aldob
	alg1
	alg6
	amacr
	ambra1a
	amotl2a
	ampd1
	anapc2
	angpt1
	angpt2a
	ankdd1a
	ankha
	ankib1a
	ankra2
	ankrd10b
	ankrd13a
	ankrd13b
	ankrd52a
	ankrd6b
	anln
	ano10a
	ano10b
	anpepa
	anxa2a
	ap1m3
	ap1s3b
	apbb1ip
	apex1
	apol1
	appb
	appbp2
	appl1
	aptx
	aqp3a
	arfip2b
	arhgap10
	arhgap12a
	arhgap15
	arhgap17b
	arhgap6
	arhgef18a
	arhgef39
	arhgef3l
	arhgef7a
	arhgef9b
	arid1aa
	arl13a
	arl13b
	arl16
	arl4d
	armc1
	arntl1a
	arntl2
	arsk
	asah2
	asap1a
	asap2a
	asb13a.2
	asb2b
	asb5b
	asmt2
	asns
	aspm
	asz1
	atad1a
	atad1b
	atad5b
	atf7a
	atf7b
	atg16l1
	atic
	atmin
	atp1b1b
	atp1b2a
	atp2a1l
	atp2b1b
	atp6v0cb
	atraid
	avl9
	b3gat3
	b3gnt2a
	b3gnt2b
	b4galt5
	baiap2a
	bbs2
	bbs4
	bcam
	bcar1
	bcl2a
	bfsp2
	bin1b
	blnk
	bmb
	bmp8a
	bnip3
	bnip3la
	bnipl
	bora
	brca2
	btbd6a
	btr06
	btr09
	btr29
	c2cd2l
	c3b.1
	c6
	c8b
	ca5a
	cab39
	cacna2d1a
	cacna2d2a
	cacnb2a
	calca
	calcoco2
	calcrla
	camk2d1
	camk2n1a
	camkk1a
	camsap2a
	cap1
	cap2
	casd1
	caska
	caspb
	cav1
	cav2
	cbr4
	cbsa
	cbwd
	cbx1b
	ccdc102a
	ccdc114
	ccdc146
	ccdc149a
	ccdc57
	ccdc80
	ccdc83
	ccdc85a
	ccdc85b
	ccdc96
	ccl34a.4
	ccna2
	ccnd1
	ccne1
	ccnf
	ccr10
	cd22
	cd276
	cd2ap
	cd82b
	cd9a
	cdc42ep1b
	cdc42ep4a
	cdc42se1
	cdc42se2
	cdc7
	cdca5
	cdca8
	cdh23
	cdip1
	cdk1
	cdk20
	cdkl1
	cdkn2aip
	cdnf
	cdr2l
	cds2
	cebpa
	cenpe
	cenph
	cenpl
	cep128
	cep41
	cep55l
	cep76
	cers4a
	cfl2
	cftr
	cga
	chad
	ches1
	chic1
	chn1
	chp2
	chst11
	chst12a
	chst14
	chst2a
	chst3b
	chsy3
	cib2
	cilp
	cited4a
	ckbb
	ckmb
	cldn10b
	cldn15lb
	cldn5b
	cldnf
	cldni
	clec14a
	cln6a
	clocka
	cluha
	cmbl
	cmklr1
	cmlc1
	cmss1
	cmtm4
	cnksr1
	cnksr3
	cnn3a
	cnn3b
	cnnm2a
	cntn1b
	cntnap2a
	coasy
	col5a3b
	col9a3
	colec10
	colec12
	comta
	comtb
	coro6
	coro7
	cplx3b
	cpm
	cpn1
	cpped1
	cpt1aa
	crb3a
	creg2
	crestin
	crim1
	crlf1a
	crlf3
	crp2
	crtc1a
	cry5
	cryba1l2
	crygm3
	crym
	cryz
	csdc2a
	csf3b
	csnk1e
	csnk1g1
	cst3
	ctnnal1
	ctnnd2b
	cx27.5
	cx30.3
	cx52.9
	cxcr3.2
	cyb561d1
	cybrd1
	cyfip2
	cygb1
	cyhr1
	cyp26c1
	cyp27c1
	cyp2aa1
	cyp2aa12
	cyp2aa4
	cyp2aa6
	cyp2aa8
	cyp2aa9
	cyp3c1
	cyp46a1.3
	cyp51
	cyp8b2
	cyyr1
	d2hgdh
	dab2
	dachb
	dag1
	dapk1
	dapk2a
	dazl
	dcaf17
	dcaf6
	dclk2a
	dclre1a
	dclre1b
	dcxr
	ddah2
	ddx11
	ddx19
	deaf1
	decr2
	def6a
	def8
	dennd2db
	dennd4a
	dennd6aa
	dennd6b
	dgat1a
	dgat1b
	dhcr7
	dhrs13a.1
	dhtkd1
	dicp3.3
	dlat
	dlg5a
	dlgap5
	dmd
	dmxl2
	dnajc25
	dnajc3a
	dnajc5gb
	dnal4b
	dnali1
	dner
	dnm1a
	dnmt1
	dnmt3ab
	dock11
	dpagt1
	dpf1
	dpf3
	dph1
	dpy19l1l
	dpyda.1
	dpys
	dpysl3
	dram1
	dsc2l
	dusp12
	dusp14
	dusp22a
	dync1i1
	dysf
	eef1a1b
	eef2a.1
	eef2a.2
	eef2k
	efhb
	efhd1
	efna1a
	efna5b
	efr3a
	ei24
	ela2
	ela2l
	elk3
	elmsan1a
	elovl6
	emilin1a
	eml1
	eml2
	emp1
	enc3
	engase
	enkur
	eno1b
	eno2
	enpp1
	enpp2
	enpp6
	entpd1
	epb41l3a
	epb41l4a
	epb41l5
	ephb3a
	ephb4b
	ephx2
	erap1b
	erap2
	erbb2
	ercc2
	ercc6l
	erf
	erg
	erlin1
	ero1a
	esama
	esr1
	esrp1
	etnk2
	etv5a
	etv7
	evla
	evpla
	evx2
	extl3
	ezh2
	ezra
	f10
	f11r.2
	f2
	f3a
	faah2a
	fabp11a
	fam102ab
	fam102ba
	fam117ab
	fam122b
	fam131a
	fam160a2
	fam169aa
	fam174b
	fam184b
	fam219ab
	fam222ba
	fam43b
	fam73b
	fan1
	fance
	fancf
	far1
	fastk
	fbn2b
	fbxl14b
	fbxl16
	fbxl4
	fbxl7
	fbxl8
	fbxo18
	fbxo30a
	fbxo30b
	fbxo43
	fdft1
	fdx1b
	fes
	fez1
	fgf1b
	fgfr2
	fgfrl1a
	fggy
	fhad1
	fhl3b
	fkbp11
	fkbp1ab
	fli1b
	flj13639
	flot1a
	flrt3
	flvcr1
	fnbp1a
	fnbp1l
	fosb
	foxi3a
	foxj1a
	foxl1
	foxn3
	foxp1b
	foxp4
	foxq1b
	foxred2
	fpgt
	fras1
	frem2a
	frzb
	fstl4
	ftr43
	fuca1.2
	fut10
	fut7
	fut9b
	fxr2
	fxyd1
	fzd1
	fzd2
	fzd5
	fzd6
	fzd7b
	g2e3
	g6fl
	g6pca.2
	gabpb1
	gabpb2b
	gabrr2a
	gabrz
	gad2
	gadd45ab
	gadd45ga
	galcb
	galnt10
	galnt14
	gamt
	gapdh
	gas1b
	gas2l3
	gata2a
	gata3
	gbp1
	gbp4
	gch1
	gda
	gdap1
	gde1
	gdf11
	gdpd1
	ggcta
	ggctb
	gins1
	gipc3
	git2b
	gk5
	glb1
	glb1l
	gli3
	glra4b
	glrx2
	glt8d1
	glt8d2
	gna11a
	gna12a
	gna13b
	gnb2
	gnb4b
	gnsb
	golga1
	golga3
	golph3l
	gorasp1a
	got1l1
	gpd1b
	gpd1c
	gpd1l
	gpd2
	gpm6ba
	gpm6bb
	gpr137ba
	gpr161
	gpr182
	gpr183a
	gpt2
	gpt2l
	gpx7
	gra
	grapb
	grb2a
	grhl1
	grhl2a
	gria1b
	grin1b
	grin2bb
	grk1a
	grn1
	grtp1a
	gsdf
	gsta.1
	gstcd
	gtdc1
	gtse1
	gxylt2
	gypc
	hapln3
	has1
	hbae3
	hcfc2
	hdac9b
	hdc
	hdx
	hells
	hemk1
	hephl1a
	her13
	her6
	herc3
	hey1
	hey2
	hhatla
	hhatlb
	hip1
	hip1rb
	hivep2a
	hkdc1
	hmga1b
	hmmr
	hmox2a
	hnf1ba
	hnrnpa3
	hoga1
	homeza
	hoxb9a
	hpcal1
	hprt1
	hps3
	hsc70
	hsd17b1
	hsp70.1
	hsp90aa1.1
	hspa12a
	hspa12b
	hspa9
	hspb6
	htr1ab
	htra1b
	hyal3
	hyal6
	icn2
	id2a
	id3
	ifit10
	ifit11
	ift57
	ift88
	igf1ra
	igf2bp1
	igf2bp2a
	igfbp3
	igfbp5a
	igfbp5b
	igfbp7
	igsf8
	ikbkb
	ikbke
	ikzf1
	il12rb2
	il15
	il15l
	il1rapl1a
	il2rgb
	illr4
	impdh1b
	inhbab
	inpp4aa
	inpp5e
	inppl1a
	insig2
	ints7
	ipmkb
	ipo8
	ipo9
	ippk
	iqgap2
	irak1bp1
	irf3
	irf5
	irf8
	irx7
	isl1l
	itchb
	itga5
	itgb1b.2
	itgb3a
	itgb4
	itpr3
	itprip
	itsn1
	itsn2a
	jag2b
	jph1a
	kalrnb
	kctd15a
	kctd7
	kdm8
	kdr
	khk
	kif11
	kif14
	kif18a
	kif20a
	kif23
	kif2c
	kif3a
	kif3b
	kif7
	kirrel3l
	kiss1rb
	kiz
	klf12a
	klf12b
	klf4
	klf7a
	klf7b
	klf8
	klhl32
	klhl36
	klhl42
	klhl6
	kpna2
	kpnb3
	l3mbtl2
	l3mbtl3
	lama4
	lamb1b
	lamc1
	lars2
	lats1
	lbx1b
	lcmt2
	lcor
	lcp2a
	ldb2b
	ldlrb
	lepr
	lfng
	lgals9l1
	lhfpl2b
	lhx9
	lig4
	limch1b
	limk1a
	lims2
	lipia
	lmbrd2b
	lmf2b
	lmna
	lmo7a
	lnx2a
	LOC553228
	LOC558818
	loxl5a
	lpcat1
	lpcat4
	lrp5
	lrpprc
	lrrc1
	lrrc6
	lrrc8db
	lrrk2
	lss
	ltbp3
	mab21l2
	mafba
	mafgb
	magi1b
	man1a2
	mansc1
	mao
	map2k2a
	map2k5
	map3k5
	map9
	mapk12b
	mapk8b
	mapk8ip3
	mapre2
	masp2
	mastl
	mate4
	matn3b
	mbd3b
	mbnl3
	mboat2b
	mbpb
	mccc1
	mcm3
	mcm6
	mcm6l
	mdh1ab
	mef2b
	mef2ca
	mef2d
	melk
	mettl7a
	mfap4
	mfge8b
	mfsd2aa
	mfsd2ab
	mfsd6b
	mgat3a
	mgll
	mhc1laa
	mhc1zfa
	micall2a
	midn
	minpp1a
	mios
	mipb
	mis18bp1
	mixl1
	mki67
	mkks
	mks1
	mlec
	mllt11
	mllt1b
	mllt3
	mmachc
	mmd
	mmp23bb
	mmp9
	mob2a
	mob3c
	mocos
	mocs1
	mogat3b
	mon1a
	morc3b
	morn2
	morn3
	mpeg1.1
	mpnd
	mpp5a
	mpp6b
	mpp7a
	mppe1
	mrpl1
	ms4a17a.1
	ms4a17a.6
	ms4a17a.7
	msh3
	msi2a
	mtf2
	mtfr1
	mthfd1b
	mtmr12
	mtmr1a
	mtmr7b
	mtr
	mtss1la
	mtx1a
	mus81
	mvp
	mxa
	mxd3
	myb
	mybl2b
	mybpc2b
	mycla
	myl2b
	myl6
	mylpfa
	myo1f
	myo3a
	myo6a
	myo7aa
	myod1
	nab2
	nadsyn1
	namptb
	nanos1
	napaa
	naprt
	nat14
	natd1
	nbn
	ncaldb
	ncam2
	ncapd2
	ncapd3
	ncapg
	ncaph
	ncf4
	ncoa2
	ndel1b
	ndrg3b
	ndufaf7
	nedd9
	neil3
	nek12
	nek4
	nek8
	neu3.3
	nf2a
	nfatc1
	nfe2l1a
	nfe2l1b
	nfil3-3
	nfkbib
	ninl
	nipsnap3a
	nkx2.3
	nkx2.5
	nkx6.1
	nlgn1
	nme4
	nme6
	nmnat1
	nmrk1
	nol4lb
	nol8
	nos2b
	notch1b
	notch2
	nova2
	noxo1a
	nphp1
	nptna
	nr1h3
	nr1i2
	nr2e3
	nr3c2
	nr4a1
	nr4a2b
	nr5a1a
	nr5a1b
	nr5a2
	nrarpa
	nrd1b
	nrm
	nrn1b
	nrp1a
	nrp2a
	nrxn1b
	nrxn3b
	nsdhl
	nsmfb
	nt5c2b
	nt5e
	nucb2b
	nucks1a
	nudt13
	nudt19
	nudt4a
	nudt4b
	numb
	nusap1
	nxn
	oard1
	oaz2b
	odc1
	olfm2b
	oplah
	opn4.1
	optc
	or104-2
	or115-13
	orc3
	osbpl6
	oxct1b
	oxr1a
	p2rx1
	p2rx3b
	p2rx7
	pacs1a
	pacsin1a
	pacsin3
	pafah1b2
	paics
	pak7
	pald1a
	pald1b
	pane1
	paplnb
	paqr7a
	pard6a
	pard6b
	pard6ga
	parp1
	parp6a
	pars2
	pax9
	pcbd1
	pcdh19
	pcdh1g18
	pcdh1gb9
	pctp
	pcxa
	pde6a
	pdgfaa
	pdia2
	pdk4
	pdp1
	pdxka
	pdxp
	pdzk1ip1
	per2
	pex1
	pex11b
	pex16
	pfas
	pfkfb2a
	pgls
	pglyrp2
	pgm3
	phactr4b
	phc2b
	phf10
	phkg1a
	phtf2
	phyhipla
	phyhiplb
	pi4kaa
	pi4kb
	picalmb
	pid1
	pigk
	pign
	pigrl3.9
	pigu
	pim3
	pip4k2aa
	pip5k1aa
	pip5k1ab
	pkz
	pla2g4aa
	plac8.1
	plag1
	plaub
	plcb3
	plce1
	plcg1
	pld1a
	plin2
	plk1
	plk4
	plod1a
	pls3
	plxdc1
	plxdc2
	plxnb2b
	pmela
	pmm2
	pmpca
	pnp5a
	pnp5b
	pnrc1
	poc1b
	pofut2
	pola1
	pold1
	pold2
	polr1b
	pomt1
	pon1
	popdc3
	porb
	pot1
	pou2f1b
	pou3f2b
	pou3f3a
	ppa1b
	ppcs
	ppfia2
	ppm1e
	ppm1f
	ppm1la
	ppm1lb
	ppp1r13ba
	ppp1r13bb
	ppp1r14ab
	ppp1r15b
	ppp1r1c
	ppp2r2bb
	ppp3cb
	ppp5c
	prc1a
	prc1b
	prdm8b
	prep
	prepl
	prickle1a
	prickle2a
	prickle2b
	prkacab
	prkag2a
	prkar2ab
	prkcba
	prkcbb
	prkcha
	prkcq
	prkra
	prmt9
	prph
	prrg1
	psmb11b
	ptch1
	ptger1a
	ptger2a
	ptger4b
	ptgr1
	ptgs1
	ptgs2b
	ptk6b
	ptn
	ptpn12
	ptpn18
	ptpn4a
	ptpra
	ptprdb
	ptprfb
	ptprja
	pvalb2
	pvalb3
	pwp1
	pycard
	pycr1b
	pygma
	pygmb
	pygo2
	qki2
	qrsl1
	qsox1
	qtrt1
	r3hdm4
	rab15
	rab23
	rab30
	rab34a
	rab3ab
	rab3c
	rab3db
	rab3ip
	rabep2
	rabgef1l
	rabggta
	rac1a
	rad51d
	rad52
	raf1b
	rag2
	ranbp3a
	rasgef1ba
	rasgrp3
	rasgrp4
	rasl11a
	rassf1
	rassf2b
	rassf8b
	rb1
	rbbp9
	rbfox1l
	rbm12
	rbm24b
	rbm45
	rbms3
	rbp5
	rcan1a
	rcan2
	rcan3
	rcor2
	rdh12
	recql
	reep2
	retsat
	rfx1a
	rfx2
	rfx4
	rgl1
	rgs11
	rgs17
	rgs19
	rhbdd3
	rhbdl2
	rhobtb2a
	rhof
	rhoga
	rhoj
	rhoq
	rhot2
	rhov
	ribc1
	ribc2
	ripk2
	rlbp1b
	rmdn1
	rnf111
	rnf121
	rnf141
	rnf144aa
	rnf144ab
	rnf144b
	rnf152
	rnf19b
	rnf24
	rnf44
	robo2
	rom1b
	roraa
	rorca
	rorcb
	rpgrip1l
	rprma
	rprmb
	rprml
	rps6ka3a
	rpz
	rrad
	rragca
	rrbp1a
	rsph9
	rtkn2a
	rtn1a
	rtn4ip1
	rtn4rl2a
	rufy2
	runx1t1
	runx2a
	runx3
	rwdd2b
	rx1
	rxfp2a
	rxraa
	ryr1b
	s100a10b
	s100v2
	s1pr2
	s1pr4
	sagb
	samm50l
	sap130b
	sash1a
	satb1a
	sbno2a
	scamp3
	scamp4
	scaper
	scarb1
	scd
	schip1
	scn2b
	scn4ba
	scn4bb
	scp2b
	scube1
	scube2
	sdcbp
	sdf2l1
	sdr16c5a
	sec24d
	sele
	selenbp1
	sema3ga
	sema4c
	sept5a
	sept8a
	serac1
	serpinb1l2
	serpinb1l4
	serpine3
	setd6
	sfxn5b
	sgcb
	sgcd
	sgcg
	sgms1
	sgpl1
	sh3bgrl2
	sh3bp4
	sh3gl3a
	sh3pxd2aa
	sh3rf1
	shbg
	si:ch1073-287p18.1
	si:ch211-110e21.3
	si:ch211-114l13.9
	si:ch211-130m23.2
	si:ch211-132b12.7
	si:ch211-156j16.1
	si:ch211-157b11.14
	si:ch211-163l21.7
	si:ch211-165i18.2
	si:ch211-185a18.2
	si:ch211-194e15.5
	si:ch211-198n5.11
	si:ch211-202h22.8
	si:ch211-203b8.6
	si:ch211-204d2.4
	si:ch211-212d10.2
	si:ch211-214j8.1
	si:ch211-216l23.1
	si:ch211-220f12.1
	si:ch211-222k6.3
	si:ch211-225p5.8
	si:ch211-234h8.7
	si:ch211-235e9.8
	si:ch211-244b2.3
	si:ch211-281g13.4
	si:ch211-281g13.5
	si:ch211-39a7.1
	si:ch211-51a19.5
	si:ch211-63o20.7
	si:ch211-69g19.2
	si:ch73-142c19.1
	si:ch73-266o15.4
	si:ch73-281f12.4
	si:ch73-359m17.9
	si:dkey-102f14.5
	si:dkey-11p10.10
	si:dkey-13e3.1
	si:dkey-153k10.9
	si:dkey-174n20.1
	si:dkey-183n20.15
	si:dkey-18p12.4
	si:dkey-193b15.5
	si:dkey-204f11.64
	si:dkey-205h13.1
	si:dkey-206d17.12
	si:dkey-228a15.1
	si:dkey-239i20.2
	si:dkey-239i20.4
	si:dkey-246g23.4
	si:dkey-24c2.9
	si:dkey-24p1.1
	si:dkey-253d23.3
	si:dkey-266f7.5
	si:dkey-29d8.3
	si:dkey-37o8.1
	si:dkey-44g23.5
	si:dkey-57a22.11
	si:dkey-5i3.5
	si:dkey-65l23.2
	si:dkey-6n6.1
	si:dkey-7n6.2
	si:dkey-97m3.1
	si:dkey-97o5.1
	si:dkey-9i23.15
	si:dkey-9i23.16
	si:dkeyp-117h8.4
	si:dkeyp-53d3.5
	si:rp71-1i20.2
	siae
	sigirr
	six5
	six6a
	skib
	skp2
	slain2
	slc12a2
	slc16a12b
	slc16a4
	slc17a5
	slc20a2
	slc22a15
	slc22a2
	slc24a4a
	slc25a15a
	slc25a15b
	slc25a21
	slc25a25b
	slc25a35
	slc25a38a
	slc26a3.2
	slc27a4
	slc29a2
	slc2a2
	slc2a8
	slc33a1
	slc35a3a
	slc35a5
	slc35b3
	slc35d1a
	slc35d1b
	slc35e1
	slc35e4
	slc35g2a
	slc38a4
	slc38a5b
	slc39a10
	slc43a2b
	slc46a1
	slc4a11
	slc4a1a
	slc4a3
	slc50a1
	slc5a11
	slc5a2
	slc5a6b
	slc5a9
	slc6a5
	slc7a4
	slc7a6
	slc7a7
	slc9a6a
	slc9a7
	slc9a8
	slco2b1
	slco3a1
	slit3
	slmapa
	smap2
	smarca5
	smc2
	smcr8b
	smg5
	smim14
	smpd4
	smurf1
	smyd1a
	smyd4
	snx18a
	snx33
	snx7
	sobpb
	socs1b
	socs2
	sort1a
	sox11b
	sox17
	sox2
	sox6
	sox7
	sp5a
	spag9a
	spam1
	spata6l
	spc24
	specc1la
	spi1a
	spi1b
	spire1a
	spns3
	spon2a
	sppl2
	spred1
	spred2b
	spry2
	spsb4a
	sptlc3
	sptssb
	src
	srd5a1
	srebf1
	srfa
	srm
	srrd
	ssuh2.2
	st14b
	st3gal3b
	st3gal7
	st6galnac4
	st8sia4
	stab2
	stam2
	stambpb
	stard10
	stard8
	stat6
	stc1
	stim1b
	stk35l
	stk38a
	ston2
	stt3b
	sulf2a
	sult6b1
	svopl
	sycp3
	syndig1l
	syngr1a
	syt11a
	tagapb
	taldo1
	tank
	tbc1d19
	tbl1x
	tbp
	tbx2b
	tbx3a
	tbx5a
	tbxa2r
	tcf7l2
	tdh2
	tead3b
	tekt2
	tet3
	tfap2c
	tfpi2
	tfr1a
	tfr1b
	tfr2
	tgfb3
	tgfbi
	tgif1
	thap3
	thy1
	ticrr
	tigara
	tln2a
	tlr5b
	tm7sf2
	tmc2a
	tmco6
	tmem110l
	tmem125b
	tmem144a
	tmem150aa
	tmem161a
	tmem175
	tmem176l.4
	tmem182a
	tmem198b
	tmem204
	tmem209
	tmem30c
	tmem35
	tmem37
	tmem41b
	tmem47
	tmem51b
	tmem68
	tmem82
	tmem86b
	tmem88b
	tmtc4
	tnfaip8l2a
	tnfaip8l2b
	tnfaip8l3
	tnfrsf19
	tnfrsf1b
	tnfrsfa
	tnfsf10l
	tnmd
	tnnt1
	tnnt3b
	tonsl
	top1mt
	top2a
	topbp1
	tor3a
	tor4ab
	tox2
	tp53bp2a
	tp63
	tpbgl
	tpcn2
	tpd52l1
	tpgs2
	tph2
	tpma
	tprg1
	tpst2
	traf3
	traf4a
	traf6
	traf7
	tram2
	trim13
	trim23
	trim35-27
	trim35-29
	trim35-7
	trim3b
	trim55b
	trim8a
	trim9
	trioa
	trmt61a
	trmu
	trpa1a
	trpc5a
	trpm2
	trub1
	tshz3b
	tspan11
	tspan7
	ttc27
	ttc39c
	ttk
	ttl
	ttll1
	ttll12
	ttll7
	tuba2
	tuba4l
	tulp4a
	twf2
	twsg1a
	tyms
	tyro3
	ube2c
	ube3a
	ubl3b
	ubl7a
	ubtd1a
	ubtd2
	ubxn10
	ubxn8
	uchl1
	uck2a
	ucp1
	ugcg
	uggt1
	ugt2a2
	ugt5b4
	unc119.1
	unc119b
	unc45a
	unc45b
	uncx4.1
	unga
	upf3a
	upk1a
	usp13
	usp20
	usp2a
	usp6nl
	uts1
	vac14
	vamp2
	vaspa
	vav3b
	vcla
	vegfab
	vldlr
	vps37c
	vps51
	vps54
	vsig8b
	wasf3b
	wbp2
	wdr54
	wdr76
	wdr89
	wdr91
	wdtc1
	wfdc1
	wipf1a
	wipf2b
	wnt2
	wnt2bb
	wnt4b
	wt1b
	wwc3
	wwox
	xk
	xkr7
	xpa
	xpnpep2
	xylb
	xylt1
	xylt2
	yars2
	ydjc
	yme1l1b
	yrdc
	ythdf1
	ythdf3
	ywhah
	zbed4
	zbtb10
	zbtb12.1
	zbtb16a
	zbtb18
	zbtb34
	zbtb43
	zbtb44
	zbtb8a
	zc3h10
	zdhhc14
	zdhhc17
	zdhhc18b
	zdhhc23b
	zdhhc24
	zdhhc7
	zdhhc9
	zfp36l2
	zfyve28
	zgc:100829
	zgc:100832
	zgc:100864
	zgc:100920
	zgc:101566
	zgc:101663
	zgc:103438
	zgc:103482
	zgc:103601
	zgc:103755
	zgc:103759
	zgc:110130
	zgc:110286
	zgc:110540
	zgc:110626
	zgc:110796
	zgc:112001
	zgc:112148
	zgc:112332
	zgc:112965
	zgc:113090
	zgc:113149
	zgc:113162
	zgc:113176
	zgc:113210
	zgc:113227
	zgc:113263
	zgc:113274
	zgc:113343
	zgc:113411
	zgc:113442
	zgc:114041
	zgc:114104
	zgc:123010
	zgc:123107
	zgc:123299
	zgc:136493
	zgc:136929
	zgc:136971
	zgc:152774
	zgc:152863
	zgc:152951
	zgc:153169
	zgc:153184
	zgc:153317
	zgc:153993
	zgc:154055
	zgc:154093
	zgc:158320
	zgc:158343
	zgc:158376
	zgc:161973
	zgc:162183
	zgc:162184
	zgc:162193
	zgc:162200
	zgc:162613
	zgc:163030
	zgc:163077
	zgc:163143
	zgc:165461
	zgc:165514
	zgc:165603
	zgc:165653
	zgc:171490
	zgc:171509
	zgc:171566
	zgc:171704
	zgc:171727
	zgc:172090
	zgc:172121
	zgc:172136
	zgc:172145
	zgc:172341
	zgc:173486
	zgc:173517
	zgc:173624
	zgc:174180
	zgc:174275
	zgc:174696
	zgc:174698
	zgc:174877
	zgc:174904
	zgc:174945
	zgc:175214
	zgc:193725
	zgc:194210
	zgc:194578
	zgc:194627
	zgc:194906
	zgc:195175
	zgc:56231
	zgc:56556
	zgc:64002
	zgc:64022
	zgc:65894
	zgc:66455
	zgc:66484
	zgc:77151
	zgc:77748
	zgc:85936
	zgc:86896
	zgc:91890
	zgc:92040
	zgc:92518
	zgc:92873
	zic2b
	zmiz1a
	zmpste24
	znf1068
	znf1070
	znf1137
	znf148
	znf185
	znf341
	znf362b
	znf367
	znf384l
	znf438
	znf503
	znf574
	znf592
	znf710a
	znf831
	znrf1
	znrf3
	zp2.6
	zswim7
	zufsp
	zwi
	zzz3
